# Supplementary material for: The Vaginal and Urinary Microbiomes in Premenopausal Women With Interstitial Cystitis/Bladder Pain Syndrome as Compared to Unaffected Controls: A Pilot Cross-Sectional Study
Source: Front Cell Infect Microbiol. 2019 Apr 8;9:92. doi: 10.3389/fcimb.2019.00092 (PMC6463740; doi:10.3389/fcimb.2019.00092)
Supplement: Supplementary Table 2 — Table of alpha diversity measures (Chao1 richness measures, McIntosh evenness index, Simpson index, and Shannon index) at 5,000 sequences per sample for all specimens, with means displayed for each group (ICBPS and unaffected) for each group of samples (urinary and vaginal). [file Table_2.xlsx]

## Sheet: 5000 Reads Per Sample Alpha Mea
Patient ID Number	Group	Phylogenetic Diversity (PD) Whole Tree	Observed Operational Taxonomic Units (OTUs)	Chao 1 (richness)	McIntosh (evenness)	Shannon Index	Simpson Index
2	ICBPS Urine Sample	17.639	260	970.64	0.496912	3.34233	0.0173246
4	ICBPS Urine Sample	17.8407	272	1092.88	0.450614	3.62672	0.0202403
5	ICBPS Urine Sample	15.3573	231	1032.32	0.525867	2.93384	0.0172003
6	ICBPS Urine Sample	18.5534	302	1079.3	0.479561	3.5089	0.0163015
7	ICBPS Urine Sample	19.6038	293	1038.53	0.408144	3.89628	0.0231083
8	ICBPS Urine Sample	17.9125	277	730.625	0.479986	3.48941	0.0175541
9	ICBPS Urine Sample	19.7416	298	878.5	0.498306	3.46559	0.0152748
10	ICBPS Urine Sample	19.7198	317	946	0.543393	3.20815	0.0121734
11	ICBPS Urine Sample	18.4051	282	1095.96	0.570854	3.01585	0.0122162
13	ICBPS Urine Sample	18.3667	267	1158.43	0.521432	3.00614	0.0153664
16	ICBPS Urine Sample	18.992	285	1068.75	0.488409	3.48782	0.0165339
17	ICBPS Urine Sample	15.7416	257	752.176	0.726311	2.3838	0.00819347
18	ICBPS Urine Sample	18.5632	302	959.286	0.58901	3.14667	0.0108061
19	ICBPS Urine Sample	17.4666	255	671.216	0.758454	2.20816	0.00756626
20	ICBPS Urine Sample	15.9388	247	820.5	0.800056	1.9291	0.00699648
22	ICBPS Urine Sample	18.9003	291	1249.54	0.474261	3.55614	0.0172173
23	ICBPS Urine Sample	17.7363	297	1080.75	0.584615	3.26231	0.0111302
24	ICBPS Urine Sample	17.3736	280	939.844	0.519964	3.21721	0.014817
25	ICBPS Urine Sample	19.2208	298	985.774	0.488737	3.65996	0.0158788
27	ICBPS Urine Sample	18.3673	309	1009.89	0.583919	3.16174	0.0107784
28	ICBPS Urine Sample	14.7401	218	707	0.533859	2.81577	0.0175884
29	ICBPS Urine Sample	16.1316	301	1027.43	0.722181	2.46136	0.00720909
30	ICBPS Urine Sample	17.7945	266	927.714	0.497134	3.19828	0.0169616
	Mean for Group (ICBPS Urine Samples)	17.8307	278.478	966.22	0.553999	3.12963	0.0142799
3	Unaffected Urine Sample	18.5188	273	852.441	0.475919	3.43266	0.0180863
12	Unaffected Urine Sample	19.1783	298	1071.53	0.456558	3.6535	0.018196
14	Unaffected Urine Sample	19.4131	318	1035	0.483899	3.52633	0.0153091
21	Unaffected Urine Sample	17.4565	247	894.538	0.555046	2.98564	0.0145366
32	Unaffected Urine Sample	17.801	280	1015.21	0.480633	3.45805	0.0173413
33	Unaffected Urine Sample	17.8772	283	1081.79	0.468263	3.51106	0.0180989
34	Unaffected Urine Sample	19.1938	290	1081.32	0.483958	3.44022	0.0165842
35	Unaffected Urine Sample	18.0031	268	884.452	0.502573	3.32589	0.0164865
36	Unaffected Urine Sample	17.7264	278	869	0.466848	3.54872	0.0184971
37	Unaffected Urine Sample	17.0143	270	747.5	0.53845	3.18094	0.0142684
38	Unaffected Urine Sample	15.5688	238	821.444	0.611314	2.6778	0.0123899
39	Unaffected Urine Sample	18.5032	304	1212.04	0.489485	3.46879	0.0155575
40	Unaffected Urine Sample	17.3266	265	728.2	0.621934	2.52404	0.0108737
41	Unaffected Urine Sample	19.3922	295	959.059	0.484166	3.53939	0.0163237
42	Unaffected Urine Sample	19.7748	315	1500.04	0.478027	3.5794	0.0158166
43	Unaffected Urine Sample	18.0666	269	937.607	0.471891	3.50757	0.0186384
46	Unaffected Urine Sample	18.4312	268	896.125	0.628632	2.72042	0.0105374
	Mean for Group (Unaffected Urine Samples)	18.1909	279.941	975.723	0.511623	3.29885	0.0157377
2	ICBPS Vaginal Sample	6.63412	182	395.895	0.977401	0.729955	0.00619165
4	ICBPS Vaginal Sample	3.9864	84	163.688	0.661523	1.8184	0.0281299
5	ICBPS Vaginal Sample	5.5847	117	796	0.689006	1.60275	0.0188693
6	ICBPS Vaginal Sample	11.0364	187	684.526	0.668049	2.01555	0.0129261
7	ICBPS Vaginal Sample	12.4638	166	481.056	0.494289	3.03614	0.0263678
8	ICBPS Vaginal Sample	8.592	111	361.25	0.493119	2.76276	0.0387341
9	ICBPS Vaginal Sample	8.95703	205	593.5	0.95763	0.942637	0.00578134
10	ICBPS Vaginal Sample	13.1973	233	683.848	0.773966	1.71843	0.00787886
11	ICBPS Vaginal Sample	7.69167	165	487.917	0.985326	0.608284	0.006673
13	ICBPS Vaginal Sample	9.37106	178	615.143	0.692717	1.69492	0.0125826
16	ICBPS Vaginal Sample	9.62322	195	522.516	0.947686	0.973393	0.00618024
17	ICBPS Vaginal Sample	5.52557	160	455.24	0.977736	0.651029	0.00697435
18	ICBPS Vaginal Sample	10.8173	216	675.038	0.960754	0.978726	0.00547638
19	ICBPS Vaginal Sample	7.23875	137	557	0.985412	0.528911	0.00794318
20	ICBPS Vaginal Sample	7.78684	181	629.636	0.980511	0.696664	0.00618385
22	ICBPS Vaginal Sample	14.2341	142	218.957	0.413281	3.8457	0.043658
23	ICBPS Vaginal Sample	7.61046	181	491.533	0.975145	0.735921	0.00625209
24	ICBPS Vaginal Sample	8.21564	187	844.353	0.73595	1.55301	0.0106509
25	ICBPS Vaginal Sample	9.39861	209	793.5	0.698059	1.68527	0.0106899
27	ICBPS Vaginal Sample	9.10111	164	605.316	0.976881	0.671641	0.00682744
28	ICBPS Vaginal Sample	8.01933	141	843.1	0.819943	1.21659	0.0111655
29	ICBPS Vaginal Sample	9.11563	213	595.533	0.943829	1.07792	0.00574727
30	ICBPS Vaginal Sample	11.8244	169	503.333	0.839652	1.63155	0.00898664
	Mean for Group (ICBPS Vaginal Samples)	8.95762	170.565	565.125	0.810777	1.44244	0.0130813
3	Unaffected Vaginal Sample	6.65402	141	324.333	0.982318	0.569822	0.00777932
12	Unaffected Vaginal Sample	12.7337	178	373.552	0.39862	3.67106	0.0379983
14	Unaffected Vaginal Sample	10.4602	175	455.286	0.391432	3.77532	0.0400323
21	Unaffected Vaginal Sample	8.76561	174	764.812	0.725068	1.82523	0.0117294
32	Unaffected Vaginal Sample	9.97326	212	1077.33	0.6398	2.13292	0.0125609
33	Unaffected Vaginal Sample	7.65018	124	418.462	0.677475	1.65656	0.0184682
34	Unaffected Vaginal Sample	7.10828	184	563.615	0.974707	0.751098	0.00616335
35	Unaffected Vaginal Sample	12.4967	227	716.517	0.779729	1.86997	0.00794799
36	Unaffected Vaginal Sample	10.3596	141	499.154	0.541162	2.59881	0.0256326
37	Unaffected Vaginal Sample	6.31803	152	544.353	0.968984	0.693292	0.00744999
38	Unaffected Vaginal Sample	7.93504	148	592	0.926482	0.943731	0.00835567
39	Unaffected Vaginal Sample	8.44594	170	670.882	0.978904	0.68116	0.00657557
40	Unaffected Vaginal Sample	9.5442	211	596.455	0.697039	1.7137	0.0106284
41	Unaffected Vaginal Sample	5.73606	160	500	0.977916	0.662971	0.00697178
42	Unaffected Vaginal Sample	9.4997	163	681.571	0.888349	1.12238	0.0083033
43	Unaffected Vaginal Sample	4.85567	120	428.077	0.88807	0.991662	0.0110878
46	Unaffected Vaginal Sample	13.934	229	688.37	0.884137	1.52503	0.00613282
	Mean for Group (Unaffected Vaginal Samples)	8.96884	171.118	582.045	0.783541	1.5991	0.013754
